# Supplementary material
Source: HighWire-hosted journal article supplement (https://bmjopen.bmj.com/content/9/12/e032391)
Supplement: inline-supplementary-material-1 [file inline-supplementary-material-1.pdf]

## Terms for impact (physical and psychological)

Fekadu W, *et al.* *BMJ Open* 2019; 9:e032391. doi: 10.1136/bmjopen-2019-032391

familialadenomatous[Title/Abstract] OR familialdefect[Title/Abstract] OR familiare[Title/Abstract] OR familiares[Title/Abstract] OR familialgenetic[Title/Abstract] OR familialhistory[Title/Abstract] OR familialipf[Title/Abstract] OR familialis[Title/Abstract] OR familialisation[Title/Abstract] OR familialisation'[Title/Abstract] OR familialism[Title/Abstract] OR familialist[Title/Abstract] OR familialistic[Title/Abstract] OR familialities[Title/Abstract] OR familiarity[Title/Abstract] OR familiarity'[Title/Abstract] OR familiarityl[Title/Abstract] OR familialization[Title/Abstract] OR familiarly[Title/Abstract] OR familialmale[Title/Abstract] OR familials[Title/Abstract] OR familiarly[Title/Abstract] OR familian[Title/Abstract] OR familianbild[Title/Abstract] OR familianis[Title/Abstract] OR familiar[Title/Abstract] OR familiar'[Title/Abstract] OR familiare[Title/Abstract] OR familiaren[Title/Abstract] OR familiarer[Title/Abstract] OR familiares[Title/Abstract] OR familiari[Title/Abstract] OR familiaria35[Title/Abstract] OR familiaribus[Title/Abstract] OR familiaridade[Title/Abstract] OR familiaries[Title/Abstract] OR familiarily[Title/Abstract] OR familiaris[Title/Abstract] OR familiarisation[Title/Abstract] OR familiarisation'[Title/Abstract] OR familiarisations[Title/Abstract] OR familiarise[Title/Abstract] OR familiarised[Title/Abstract] OR familiarises[Title/Abstract] OR familiarising[Title/Abstract] OR familiariszation[Title/Abstract] OR familiarita[Title/Abstract] OR familiaritas[Title/Abstract] OR familiarite[Title/Abstract] OR familiarities[Title/Abstract] OR familiarity[Title/Abstract] OR familiarity'[Title/Abstract] OR familiarity's[Title/Abstract] OR familiarityand[Title/Abstract] OR familiarizados[Title/Abstract] OR familiarization[Title/Abstract] OR familiarizations[Title/Abstract] OR familiarize[Title/Abstract] OR familiarized[Title/Abstract] OR familiarizereaders[Title/Abstract] OR familiarizes[Title/Abstract] OR familiarizing[Title/Abstract] OR familiarly[Title/Abstract] OR familiars[Title/Abstract] OR familiars'[Title/Abstract] OR familiarwith[Title/Abstract] OR familiarly[Title/Abstract] OR familias[Title/Abstract] OR familiaux[Title/Abstract] OR familical[Title/Abstract] OR familicidal[Title/Abstract] OR familicide[Title/Abstract] OR familicides[Title/Abstract] OR familidal[Title/Abstract] OR familie[Title/Abstract] OR familie's[Title/Abstract] OR familiefond[Title/Abstract] OR familiegeheim[Title/Abstract] OR familiehulp[Title/Abstract] OR familien[Title/Abstract] OR familienallianz[Title/Abstract] OR familienanamnese[Title/Abstract] OR familienangehorige[Title/Abstract] OR familienarmut[Title/Abstract] OR familienbasierte[Title/Abstract] OR familienbegleiter[Title/Abstract] OR familienbelastung[Title/Abstract] OR familienberatung[Title/Abstract] OR familienboegen[Title/Abstract] OR familienbogen[Title/Abstract] OR familiendiagnostik[Title/Abstract] OR familienfragebogen[Title/Abstract] OR familienfunktionalitat[Title/Abstract] OR familiengerechte[Title/Abstract] OR familiengesundheitspflege[Title/Abstract] OR familiengrosse[Title/Abstract] OR familiengrossen[Title/Abstract] OR familienhebamme[Title/Abstract] OR familieninteraktion[Title/Abstract] OR familieninteraktions[Title/Abstract] OR familienklima[Title/Abstract] OR familienkoharenz[Title/Abstract] OR familienkommunikation[Title/Abstract] OR familienkonflikt[Title/Abstract] OR familienmedizin[Title/Abstract] OR familienmitglieder[Title/Abstract] OR familienorientierte[Title/Abstract] OR familienpflege[Title/Abstract] OR familienpflegemodell[Title/Abstract] OR familienplanung[Title/Abstract] OR familienpolitik[Title/Abstract] OR familienrechtspsychologie[Title/Abstract] OR familienroman[Title/Abstract] OR familienstiftung[Title/Abstract] OR familientagesklinik[Title/Abstract] OR familientherapie[Title/Abstract] OR familienzentrierte[Title/Abstract] OR familieplanlaegning[Title/Abstract] OR familier[Title/Abstract] OR familieres[Title/Abstract] OR

familiers[Title/Abstract] OR families[Title/Abstract] OR families'[Title/Abstract] OR families'barriers[Title/Abstract] OR families'children[Title/Abstract] OR families'comments[Title/Abstract] OR families'health[Title/Abstract] OR families'importance[Title/Abstract] OR families'negative[Title/Abstract] OR families'pain[Title/Abstract] OR families'patterns[Title/Abstract] OR families'reactions[Title/Abstract] OR families10[Title/Abstract] OR families4families[Title/Abstract] OR familiesand[Title/Abstract] OR familiesfound[Title/Abstract] OR familieshave[Title/Abstract] OR familiesi[Title/Abstract] OR familiesiseven[Title/Abstract] OR familiestrade[Title/Abstract] OR familieswith[Title/Abstract] OR familiies[Title/Abstract] OR familila[Title/Abstract] OR famililal[Title/Abstract] OR famililar[Title/Abstract] OR familily[Title/Abstract] OR familio[Title/Abstract] OR familiogram[Title/Abstract] OR familion[Title/Abstract] OR familirs[Title/Abstract] OR familis[Title/Abstract] OR familisim[Title/Abstract] OR familism[Title/Abstract] OR familism's[Title/Abstract] OR familisme[Title/Abstract] OR familismo[Title/Abstract] OR familismo'[Title/Abstract] OR familist[Title/Abstract] OR familist's[Title/Abstract] OR familistic[Title/Abstract] OR familistic'[Title/Abstract] OR familitalia[Title/Abstract] OR familites[Title/Abstract] OR families[Title/Abstract] OR family[Title/Abstract] OR familiy[Title/Abstract] OR familization[Title/Abstract] OR familized[Title/Abstract] OR familjeklimat[Title/Abstract] OR familjeplaneringsfonden[Title/Abstract] OR famillal[Title/Abstract] OR famille[Title/Abstract] OR familles[Title/Abstract] OR familletti[Title/Abstract] OR famillial[Title/Abstract] OR familliar[Title/Abstract] OR famillie[Title/Abstract] OR famillies[Title/Abstract] OR famillism[Title/Abstract] OR familly[Title/Abstract] OR familon[Title/Abstract] OR familons[Title/Abstract] OR familty[Title/Abstract] OR familure[Title/Abstract] OR familusi[Title/Abstract] OR family[Title/Abstract] OR family'[Title/Abstract] OR family''[Title/Abstract] OR family's[Title/Abstract] OR family's'[Title/Abstract] OR family1[Title/Abstract] OR family10[Title/Abstract] OR family100[Title/Abstract] OR family12[Title/Abstract] OR family13[Title/Abstract] OR family14[Title/Abstract] OR family19[Title/Abstract] OR family1a[Title/Abstract] OR family2[Title/Abstract] OR family22[Title/Abstract] OR family26a4[Title/Abstract] OR family31[Title/Abstract] OR family33[Title/Abstract] OR family53[Title/Abstract] OR family6[Title/Abstract] OR family7[Title/Abstract] OR familyaids[Title/Abstract] OR familyal[Title/Abstract] OR familyand[Title/Abstract] OR familyare[Title/Abstract] OR familyat[Title/Abstract] OR familybaculoviridae[Title/Abstract] OR familycarabidae[Title/Abstract] OR familycare[Title/Abstract] OR familycaregivers[Title/Abstract] OR familycase[Title/Abstract] OR familycentred[Title/Abstract] OR familychloroflexaceae[Title/Abstract] OR familydesulfovibrionaceae[Title/Abstract] OR familydoctor[Title/Abstract] OR familyelderly[Title/Abstract] OR familyelders[Title/Abstract] OR familyenterobacteriaceae[Title/Abstract] OR familyenterobacteriaceaeathat[Title/Abstract] OR familyfocused[Title/Abstract] OR familyformation[Title/Abstract] OR familygenomics[Title/Abstract] OR familyh[Title/Abstract] OR familyhepeviridae[Title/Abstract] OR familyhigh[Title/Abstract] OR familyhistory[Title/Abstract] OR familyhood[Title/Abstract] OR familyhx[Title/Abstract] OR familyibi[Title/Abstract] OR familyid[Title/Abstract] OR families[Title/Abstract] OR familyintroductionforward[Title/Abstract] OR familyis[Title/Abstract] OR familyism[Title/Abstract] OR familyjoint[Title/Abstract] OR familyla[Title/Abstract] OR familyless[Title/Abstract] OR familylink[Title/Abstract] OR familylog[Title/Abstract] OR familylow[Title/Abstract] OR familymedicineuwo[Title/Abstract] OR familymembers[Title/Abstract] OR familymenuforward[Title/Abstract] OR familymethanomicrobiaceaeacomprises[Title/Abstract] OR

familynursing[Title/Abstract] OR familypicornaviridaeand[Title/Abstract] OR  
 familyplanning[Title/Abstract] OR familyplug[Title/Abstract] OR familypso[Title/Abstract] OR  
 familypsychiatry[Title/Abstract] OR familypsychological[Title/Abstract] OR familypyrin[Title/Abstract] OR  
 familyrca[Title/Abstract] OR familyreferring[Title/Abstract] OR familyrelations[Title/Abstract] OR  
 familyrelationsii[Title/Abstract] OR familys[Title/Abstract] OR familyscape[Title/Abstract] OR  
 familysearch[Title/Abstract] OR familysearcher[Title/Abstract] OR familysize[Title/Abstract] OR  
 familyspecific[Title/Abstract] OR familystudy[Title/Abstract] OR familystyle[Title/Abstract] OR  
 familytarget[Title/Abstract] OR familytherapeutic[Title/Abstract] OR familytherapists[Title/Abstract] OR  
 familytherapy[Title/Abstract] OR familyv[Title/Abstract] OR familyvio[Title/Abstract] OR  
 familywas[Title/Abstract] OR familywide[Title/Abstract] OR familywise[Title/Abstract] OR  
 familyx[Title/Abstract] OR familyxenvironment[Title/Abstract])) OR "caregiver\* burden"[Title/Abstract])  
 OR ("family"[MeSH Terms] OR family[Text Word])) AND (((((((burden[Title/Abstract] OR "caregiver  
 burden"[Title/Abstract]) OR (impact[Title/Abstract] OR impact'[Title/Abstract] OR  
 impact"[Title/Abstract] OR impact's[Title/Abstract] OR impact1[Title/Abstract] OR  
 impact2[Title/Abstract] OR impact200[Title/Abstract] OR impact2000[Title/Abstract] OR  
 impact2002[Title/Abstract] OR impact2c[Title/Abstract] OR impact3[Title/Abstract] OR  
 impact3's[Title/Abstract] OR impact4[Title/Abstract] OR impact65[Title/Abstract] OR  
 impacta[Title/Abstract] OR impacta2002[Title/Abstract] OR impactability[Title/Abstract] OR  
 impactable[Title/Abstract] OR impactacion[Title/Abstract] OR impactagainst[Title/Abstract] OR  
 impactaging[Title/Abstract] OR impactam[Title/Abstract] OR impactando[Title/Abstract] OR  
 impactar[Title/Abstract] OR impactaram[Title/Abstract] OR impactation[Title/Abstract] OR  
 impactations[Title/Abstract] OR impactball[Title/Abstract] OR impactboth[Title/Abstract] OR  
 impactdose[Title/Abstract] OR impacte[Title/Abstract] OR impacted[Title/Abstract] OR  
 impacted'[Title/Abstract] OR impactedfishbone[Title/Abstract] OR impactedly[Title/Abstract] OR  
 impactedness[Title/Abstract] OR impactedtreatment[Title/Abstract] OR impactteen[Title/Abstract] OR  
 impactter[Title/Abstract] OR impactestrogenic[Title/Abstract] OR impactfactor[Title/Abstract] OR  
 impactfactorius[Title/Abstract] OR impactfactorius'[Title/Abstract] OR impactfactors[Title/Abstract] OR  
 impactfactorsearch[Title/Abstract] OR impactfor[Title/Abstract] OR impactful[Title/Abstract] OR  
 impactfulness[Title/Abstract] OR impactfunction[Title/Abstract] OR impactibility[Title/Abstract] OR  
 impactin[Title/Abstract] OR impacting[Title/Abstract] OR impactio[Title/Abstract] OR  
 impaction[Title/Abstract] OR impaction'[Title/Abstract] OR impactioning[Title/Abstract] OR  
 impactionless[Title/Abstract] OR impactions[Title/Abstract] OR impactite[Title/Abstract] OR  
 impactites[Title/Abstract] OR impactitis[Title/Abstract] OR impactive[Title/Abstract] OR  
 impactively[Title/Abstract] OR impactless[Title/Abstract] OR impactmc[Title/Abstract] OR  
 impactment[Title/Abstract] OR impactmodeling[Title/Abstract] OR impactncd[Title/Abstract] OR  
 impactnow[Title/Abstract] OR impacto[Title/Abstract] OR impactof[Title/Abstract] OR  
 impactolatry[Title/Abstract] OR impactology[Title/Abstract] OR impactomania[Title/Abstract] OR  
 impactometer[Title/Abstract] OR impacton[Title/Abstract] OR impactor[Title/Abstract] OR  
 impactor's[Title/Abstract] OR impactors[Title/Abstract] OR impactortrade[Title/Abstract] OR  
 impactos[Title/Abstract] OR impactotherapy[Title/Abstract] OR impactou[Title/Abstract] OR  
 impactpa[Title/Abstract] OR impactpapaq[Title/Abstract] OR impactpharmacie[Title/Abstract] OR  
 impactpro[Title/Abstract] OR impactrank[Title/Abstract] OR impactron[Title/Abstract] OR  
 impacts[Title/Abstract] OR impacts'[Title/Abstract] OR impactscan[Title/Abstract] OR  
 impactsec[Title/Abstract] OR impactsnetwork[Title/Abstract] OR impactspig[Title/Abstract] OR

impactstory[Title/Abstract] OR impactt[Title/Abstract] OR impactted[Title/Abstract] OR  
impactthe[Title/Abstract] OR impacttm[Title/Abstract] OR impacttrade[Title/Abstract] OR  
impactus[Title/Abstract] OR impactvector[Title/Abstract] OR impactwhen[Title/Abstract] OR  
impactworld[Title/Abstract])) OR health[Title/Abstract]) OR illness[Title/Abstract]) OR  
mortality[Title/Abstract]) OR poverty[Title/Abstract]) OR (econom[Title/Abstract] OR  
economa[Title/Abstract] OR economase[Title/Abstract] OR economasetrade[Title/Abstract] OR  
economate[Title/Abstract] OR economc[Title/Abstract] OR economechnological[Title/Abstract] OR  
economedita[Title/Abstract] OR economet[Title/Abstract] OR econometric[Title/Abstract] OR  
econometrica[Title/Abstract] OR econometrica33[Title/Abstract] OR econometrical[Title/Abstract] OR  
econometrically[Title/Abstract] OR econometrician[Title/Abstract] OR econometrician's[Title/Abstract]  
OR econometricians[Title/Abstract] OR econometrics[Title/Abstract] OR econometrics'[Title/Abstract]  
OR econometrists[Title/Abstract] OR econometry[Title/Abstract] OR economi[Title/Abstract] OR  
economia[Title/Abstract] OR economical[Title/Abstract] OR economically[Title/Abstract] OR  
economiaspects[Title/Abstract] OR economic[Title/Abstract] OR economic'[Title/Abstract] OR  
economic''[Title/Abstract] OR economic's[Title/Abstract] OR economica[Title/Abstract] OR  
economical[Title/Abstract] OR economical'[Title/Abstract] OR economicall[Title/Abstract] OR  
economically[Title/Abstract] OR economically'[Title/Abstract] OR economicallyoriented[Title/Abstract]  
OR economicallyuncovered[Title/Abstract] OR economicalness[Title/Abstract] OR  
economicaly[Title/Abstract] OR economicamente[Title/Abstract] OR economicas[Title/Abstract] OR  
economicbranches[Title/Abstract] OR economiche[Title/Abstract] OR economici[Title/Abstract] OR  
economicissue[Title/Abstract] OR economicist[Title/Abstract] OR economicist'[Title/Abstract] OR  
economicity[Title/Abstract] OR economiclly[Title/Abstract] OR economicmicro[Title/Abstract] OR  
economico[Title/Abstract] OR economicomathematical[Title/Abstract] OR economicos[Title/Abstract]  
OR economicosocial[Title/Abstract] OR economicperformance[Title/Abstract] OR  
economicpubguidelines[Title/Abstract] OR economics[Title/Abstract] OR economics'[Title/Abstract] OR  
economicscience[Title/Abstract] OR economicus[Title/Abstract] OR economicus'[Title/Abstract] OR  
economicus'rationalism[Title/Abstract] OR economicwise[Title/Abstract] OR economides[Title/Abstract]  
OR economidesi[Title/Abstract] OR economidichthys[Title/Abstract] OR economidisi[Title/Abstract] OR  
economie[Title/Abstract] OR economies[Title/Abstract] OR economies'[Title/Abstract] OR  
econominal[Title/Abstract] OR economique[Title/Abstract] OR economiques[Title/Abstract] OR  
economis[Title/Abstract] OR economisation[Title/Abstract] OR economisch[Title/Abstract] OR  
economise[Title/Abstract] OR economised[Title/Abstract] OR economiser[Title/Abstract] OR  
economisers[Title/Abstract] OR economises[Title/Abstract] OR economish[Title/Abstract] OR  
economising[Title/Abstract] OR economism[Title/Abstract] OR economist[Title/Abstract] OR  
economist'[Title/Abstract] OR economist's[Title/Abstract] OR economistas[Title/Abstract] OR  
economistes[Title/Abstract] OR economicic[Title/Abstract] OR economists[Title/Abstract] OR  
economists'[Title/Abstract] OR economization[Title/Abstract] OR economize[Title/Abstract] OR  
economized[Title/Abstract] OR economizeforensic[Title/Abstract] OR economizer[Title/Abstract] OR  
economizers[Title/Abstract] OR economizers'[Title/Abstract] OR economizes[Title/Abstract] OR  
economizing[Title/Abstract] OR economizing'[Title/Abstract] OR economnic[Title/Abstract] OR  
econo[Title/Abstract] OR economo's[Title/Abstract] OR economical[Title/Abstract] OR  
economopoulos[Title/Abstract] OR economopoulou[Title/Abstract] OR economos[Title/Abstract] OR  
economos'[Title/Abstract] OR economou[Title/Abstract] OR economical[Title/Abstract] OR  
economu[Title/Abstract] OR economus[Title/Abstract] OR economy[Title/Abstract] OR

economy'[Title/Abstract] OR economy's[Title/Abstract] OR economycin[Title/Abstract] OR  
economyto[Title/Abstract] OR economywide[Title/Abstract])) OR (((("Cost of Illness"[Mesh] OR  
"Dependency (Psychology)"[Mesh]) OR "Family Health"[Mesh]) OR "Poverty"[Mesh])) AND  
"humans"[MeSH Terms]

## Search for Embase

Severe mental illness.mp. or exp schizophrenia/ or exp psychosis/ or exp schizophrenia spectrum disorder/ or exp schizophrenia/ or exp bipolar disorder/ or exp bipolar II disorder/ or exp bipolar I disorder/ or exp major depression/ or exp depression/ and exp caregiver/ or exp family/ parent exp or grandparent exp or offspring.mp. or grandchild exp or child/ and burden.mp. or exp caregiver burden/ or impact.mp. or exp health/ or distress.mp. or psychopathology.mp. or exp "health care cost"/ or financial impact.mp.

## PsycInfo

((exp schizophrenia/ or exp mental disease/ or exp bipolar disorder/ or Severe mental illness mp or exp psychology/ or exp psychosis/ or exp chronic depression/ or exp depression/ or exp major depression/ or depression mp or exp bipolar depression/)  
**and** (caregiver mp or exp caregiver/ or family mp or exp family/ or exp parent or exp grandparent or offspring mp or exp grandchild) **and** (exp minor depression/ or exp chronic depression/ or exp depression/ or exp major depression/ or depression mp or exp bipolar depression/ or exp chronic stress/ or exp emotional stress/ or exp mental stress/ or exp family stress/ or exp stress/ or stress mp or exp acute stress/ or anxiety mp or exp anxiety/ or exp separation anxiety/ or exp anxiety disorder/ or exp generalized anxiety disorder/ or health mp or exp child health/ or exp health/ or exp mental health/ or exp health status/ or exp family health/ or morbidity mp or exp morbidity/ or mortality mp or exp mortality/ or physical health mp)).ab.

## Global Index Medicus

Severe mental illness OR schizophrenia OR bipolar disorder OR bipolar OR major depression OR depression AND caregiver OR family OR parent OR grandparent OR offspring OR grandchild AND Burden OR Impact OR anxiety OR Stress OR psychopathology OR health OR morbidity OR mortality OR chronic disease.
