# Supplementary material
Source: HighWire-hosted journal article supplement (https://bmjopen.bmj.com/content/9/12/e032391)
Supplement: inline-supplementary-material-2 [file inline-supplementary-material-2.pdf]

## Supplementary File 2: Quality assessment for multidimensional impact of severe mental illness on family members

|     | Author (year)                 | Criteria        |               |              |           |                         |                            | Global rating*** |
|-----|-------------------------------|-----------------|---------------|--------------|-----------|-------------------------|----------------------------|------------------|
|     |                               | Selection bias* | Study design* | Confounders* | Blinding* | Data collection method* | Withdrawals and dropouts** |                  |
| 1.  | Aschbrenner, et al., 2009     |                 |               |              |           |                         |                            |                  |
| 2.  | Ashaba. et al., 2015          |                 |               |              |           |                         | NA                         |                  |
| 3.  | Chessick, et al., 2009        |                 |               |              |           |                         |                            |                  |
| 4.  | De Andres Garcia, et al, 2016 |                 |               |              |           |                         |                            |                  |
| 5.  | Donatelli, et al, 2010        |                 |               |              |           |                         |                            |                  |
| 6.  | Ellersgaard, et al., 2018     |                 |               |              |           |                         | NA                         |                  |
| 7.  | Gupta, et al., 2015           |                 |               |              |           |                         | NA                         |                  |
| 8.  | Gutierrez Maldonado, 2005     |                 |               |              |           |                         | NA                         |                  |
| 9.  | Hanzawa,, 2008                |                 |               |              |           |                         | NA                         |                  |
| 10. | Henin. et al., 2005           |                 |               |              |           |                         |                            |                  |
| 11. | Hsiao, Tsai, 2014             |                 |               |              |           |                         | NA                         |                  |
| 12. | Hsiao, Tsai, 2015.            |                 |               |              |           |                         | NA                         |                  |
| 13. | Igberase, et al., 2012        |                 |               |              |           |                         | NA                         |                  |
| 14. | Jundong, et al., 2012         |                 |               |              |           |                         |                            |                  |
| 15. | Lam, et al., 2013             |                 |               |              |           |                         | NA                         |                  |
| 16. | Mitsonis, et al., 2012        |                 |               |              |           |                         | NA                         |                  |
| 17. | Parabiaghi, et al., 2007.     |                 |               |              |           |                         |                            |                  |
| 18. | Perlick, et al., 2016         |                 |               |              |           |                         |                            |                  |
| 19. | Petresco et al., 2009         |                 |               |              |           |                         | NA                         |                  |
| 20. | Ranning et al., 2018          |                 |               |              |           |                         |                            |                  |

|    |                               |  |  |  |    |  |    |  |
|----|-------------------------------|--|--|--|----|--|----|--|
| 21 | Ritsher, et al., 2001         |  |  |  |    |  |    |  |
| 22 | Roick, et al., 2007           |  |  |  |    |  | NA |  |
| 23 | Romero, et al., 2005          |  |  |  |    |  | NA |  |
| 24 | Sanchez. et al., 2015         |  |  |  |    |  | NA |  |
| 25 | Schubert, 2003                |  |  |  |    |  |    |  |
| 26 | Shibre, et al., 2012          |  |  |  |    |  |    |  |
| 27 | Shibre, et al., 2003.         |  |  |  |    |  | NA |  |
| 28 | Sucksdorff, et al., 2014      |  |  |  | NA |  | NA |  |
| 29 | Terzian, et al., 2007         |  |  |  |    |  | NA |  |
| 30 | Thunyadee, et al., 2015       |  |  |  |    |  | NA |  |
| 31 | Tirfessa, et al, 2017         |  |  |  |    |  | NA |  |
| 32 | Van Wijngaarden, et al, 2004  |  |  |  |    |  | NA |  |
| 33 | Van Wijngaarden, et al., 2009 |  |  |  |    |  | NA |  |
| 34 | Weissman, et al.,2005         |  |  |  |    |  |    |  |
| 35 | Weissman, et al., 2016        |  |  |  |    |  |    |  |
| 36 | Zahid, 2010.                  |  |  |  |    |  | NA |  |
| 37 | Zappitelli, et al., 2011      |  |  |  |    |  | NA |  |
| 38 | Zendjidjian, et al, 2012      |  |  |  |    |  | NA |  |
| 39 | Zergaw, et al, 2008           |  |  |  |    |  |    |  |

= Strong

= Moderate

= Weak

NA= Not Applicable
